# Supplementary material for: Deep Immunophenotyping of Circulating T and B Cells in Relapsing Adult-Onset Still’s Disease
Source: MDPI journal article supplement (doi:10.3390/cimb46020075), 2024-02-01
Supplement: s1 [file s1]

**Supplementary Table S1.** List of monoclonal antibodies for immunophenotyping of peripheral blood CD4<sup>+</sup> T cell subsets (all antibodies were manufactured by BioLegend, Inc., San Diego, CA, USA).

| N | Antigen       | Fluorochrome         | Clone   | Isotype               | Cat. number |
|---|---------------|----------------------|---------|-----------------------|-------------|
| 1 | CD45RA        | FITC                 | HI100   | Mouse IgG2b, $\kappa$ | 304106      |
| 2 | CD62L         | PE                   | DREG-56 | Mouse IgG1, k         | 304806      |
| 3 | CD185 (CXCR5) | PerCP/Cy5.5          | J252D4  | Mouse IgG1, k         | 356910      |
| 4 | CD196 (CCR6)  | PE/Cy7               | G034E3  | Mouse IgG2b, k        | 353418      |
| 5 | CD183 (CXCR3) | APC                  | G025H7  | Mouse IgG1, k         | 353708      |
| 6 | CD3           | APC/Cy7              | HIT3a   | Mouse IgG2a, k        | 300318      |
| 7 | CD4           | Pacific Blue         | OKT4    | Mouse IgG2b, k        | 317429      |
| 8 | CD194 (CCR4)  | Brilliant Violet 510 | L291H4  | Mouse IgG1, k         | 359416      |

**Supplementary Table S2.** List of monoclonal antibodies for immunophenotyping of peripheral blood CD8<sup>+</sup> T cell subsets (all antibodies were manufactured by BioLegend, Inc., San Diego, CA, USA).

| N | Antigen       | Fluorochrome         | Clone   | Isotype               | Cat. number |
|---|---------------|----------------------|---------|-----------------------|-------------|
| 1 | CD45RA        | FITC                 | HI100   | Mouse IgG2b, $\kappa$ | 304106      |
| 2 | CD62L         | PE                   | DREG-56 | Mouse IgG1, k         | 304806      |
| 3 | CD185 (CXCR5) | PerCP/Cy5.5          | J252D4  | Mouse IgG1, k         | 356910      |
| 4 | CD196 (CCR6)  | PE/Cy7               | G034E3  | Mouse IgG2b, k        | 353418      |
| 5 | CD183 (CXCR3) | APC                  | G025H7  | Mouse IgG1, k         | 353708      |
| 6 | CD3           | APC/Cy7              | HIT3a   | Mouse IgG2a, k        | 300318      |
| 7 | CD8           | Pacific Blue         | SK1     | Mouse IgG2b, k        | 344718      |
| 8 | CD194 (CCR4)  | Brilliant Violet 510 | L291H4  | Mouse IgG1, k         | 359416      |

**Supplementary Table S3.** List of monoclonal antibodies for immunophenotyping of peripheral blood CD19<sup>+</sup> B cell subsets (CD45 was manufactured by Beckman Coulter Inc., all other antibodies were manufactured by BioLegend, Inc., San Diego, CA, USA).

| N | Antigen | Fluorochrome    | Clone  | Isotype               | Cat. number |
|---|---------|-----------------|--------|-----------------------|-------------|
| 1 | IgD     | Alexa Fluor 488 | IA6-2  | Mouse IgG2a, $\kappa$ | 348216      |
| 2 | CD38    | PE              | HB-7   | Mouse IgG1, k         | 356604      |
| 3 | CD27    | PE/Cy7          | M-T271 | Mouse IgG1, k         | 356412      |
| 4 | CD24    | Alexa Fluor 647 | ML5    | Mouse IgG2a, $\kappa$ | 311110      |
| 5 | CD19    | APC/Cy7         | HIB19  | Mouse IgG1, k         | 302218      |
| 6 | CD5     | Pacific Blue    | L17F12 | Mouse IgG2a, k        | 364024      |
| 7 | CD45    | Krome Orange    | J33    | Mouse IgG1            | B36294      |

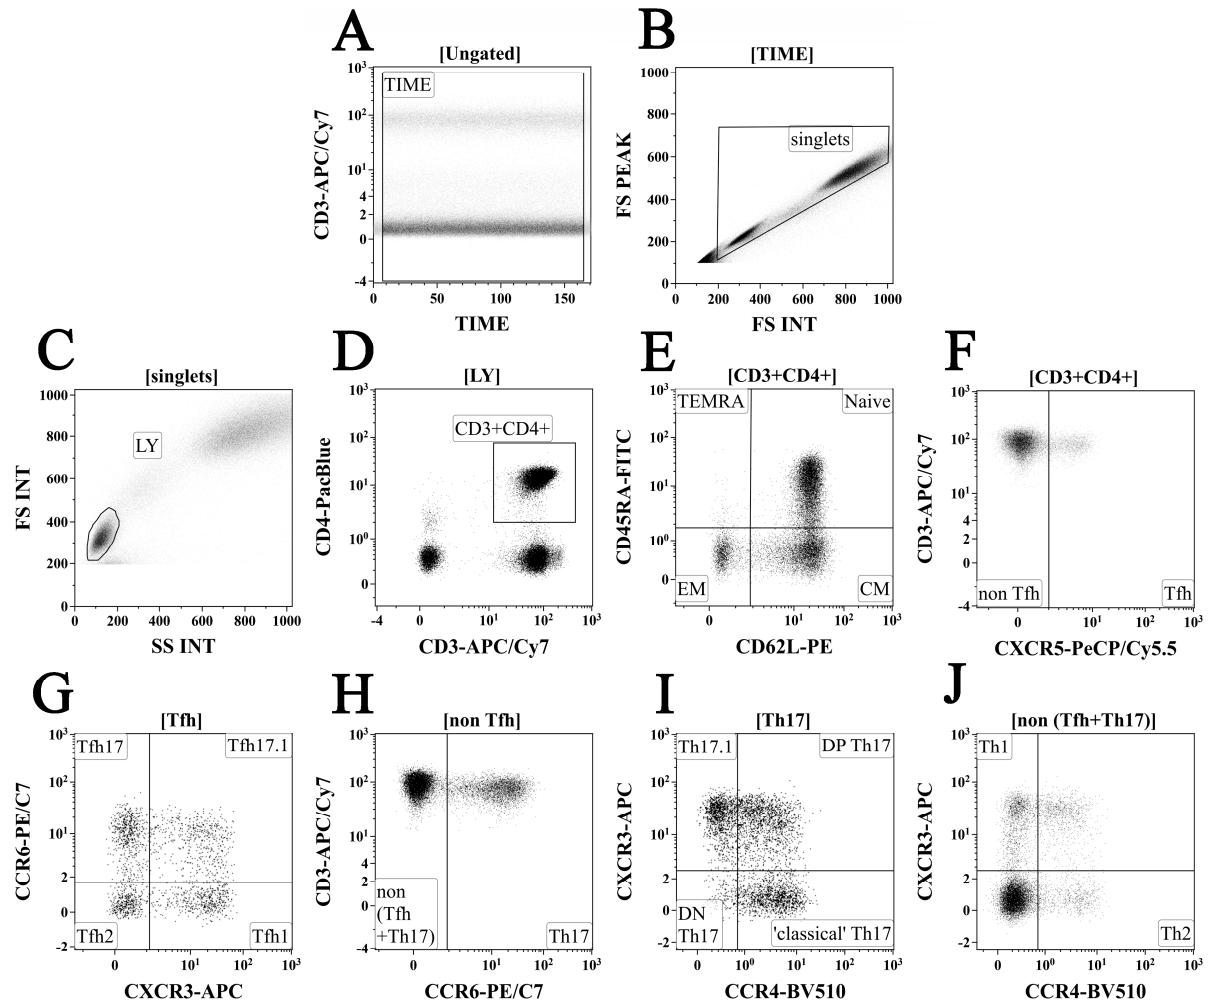

**Supplementary Figure S1.** Flow cytometry gating strategy used to define CD4<sup>+</sup> T cell subsets.

Dot plot A – artifact exclusion by ‘time gating’; dot plot B – aggregated cells exclusion; dot plot C – total lymphocyte subset identification; dot plot D – Th cells were identified as CD3<sup>+</sup>CD4<sup>+</sup> subset; dot plot E – within total CD4<sup>+</sup> T cells CD45RA<sup>+</sup>CD62L<sup>+</sup> ‘naïve’ (naïve), CD45RA<sup>+</sup>CD62L<sup>+</sup> central memory (CM), CD45RA<sup>+</sup>CD62L<sup>+</sup> effector memory (EM), and CD45RA<sup>+</sup>CD62L<sup>+</sup> terminally differentiated CD45RA<sup>+</sup> positive effector memory (TEMRA) cells were identified. Dot plot F – based on CXCR5 expression follicular Th cells (Tfh) were identified; dot plot G – four main Tfh cell subsets – Tfh1 (CXCR3<sup>+</sup>CCR6<sup>+</sup>), Tfh2 (CXCR3<sup>+</sup>CCR6<sup>+</sup>), Tfh17 (CXCR3<sup>+</sup>CCR6<sup>+</sup>), and DP Tfh (CXCR3<sup>+</sup>CCR6<sup>+</sup>) were determined within total Tfh cells. Dot plot H – Th17 cells were detected within CXCR5 negative Th cell, and, dot plot I – four main Th17 cell subsets, including ‘classical’ Th17 cells with CXCR3<sup>+</sup>CCR4<sup>+</sup> phenotype, double-negative (DN) Th17 with CXCR3<sup>+</sup>CCR4<sup>+</sup> phenotype, double-positive (DP) Th17 cells with CXCR3<sup>+</sup>CCR4<sup>+</sup> phenotype, and Th17.1 cells with CXCR3<sup>+</sup>CCR4<sup>+</sup> were determined within total Th17 cells. Finally, dot plot J – within CXCR5<sup>+</sup>CCR6<sup>+</sup> T cell subset we determined Th1 (CXCR5<sup>+</sup>CCR6<sup>+</sup>CCR4<sup>+</sup>CXCR3<sup>+</sup>) and Th2 (CXCR5<sup>+</sup>CCR6<sup>+</sup>CCR4<sup>+</sup>CXCR3<sup>+</sup>) cell subsets.

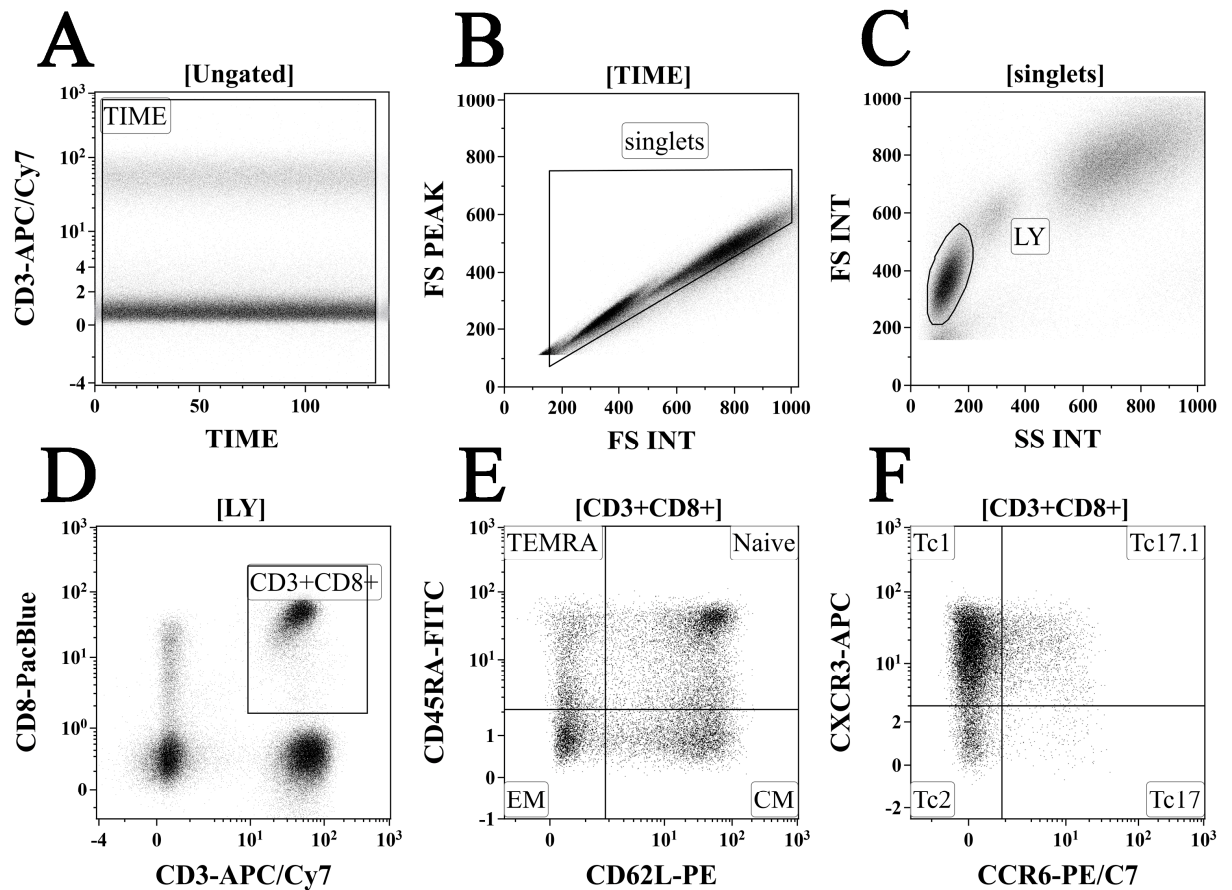

**Supplementary Figure S2.** Flow cytometry gating strategy used to define CD8<sup>+</sup> T cell subsets.

Dot plot A – artifact exclusion by ‘time gating’; dot plot B – aggregated cells exclusion; dot plot C – total lymphocyte subset identification; dot plot D – CD8<sup>+</sup> T cells were identified as CD3<sup>+</sup>CD8<sup>+</sup> subset; dot plot E – within total CD8<sup>+</sup> T cells CD45RA<sup>+</sup>CD62L<sup>+</sup> ‘naïve’ (naïve), CD45RA<sup>+</sup>CD62L<sup>+</sup> central memory (CM), CD45RA<sup>+</sup>CD62L<sup>+</sup> effector memory (EM), and CD45RA<sup>+</sup>CD62L<sup>+</sup> terminally differentiated CD45RA-positive effector memory (TEMRA) cells were identified. Dot plot F – within total CD8<sup>+</sup> T cells four main ‘polarized’ subsets were determined, including CCR6<sup>+</sup>CXCR3<sup>+</sup> Tc1, CCR6<sup>+</sup>CXCR3<sup>+</sup> Tc2, CCR6<sup>+</sup>CXCR3<sup>+</sup> Tc17, and double-positive CCR6<sup>+</sup>CXCR3<sup>+</sup> Tc17.1 cells.

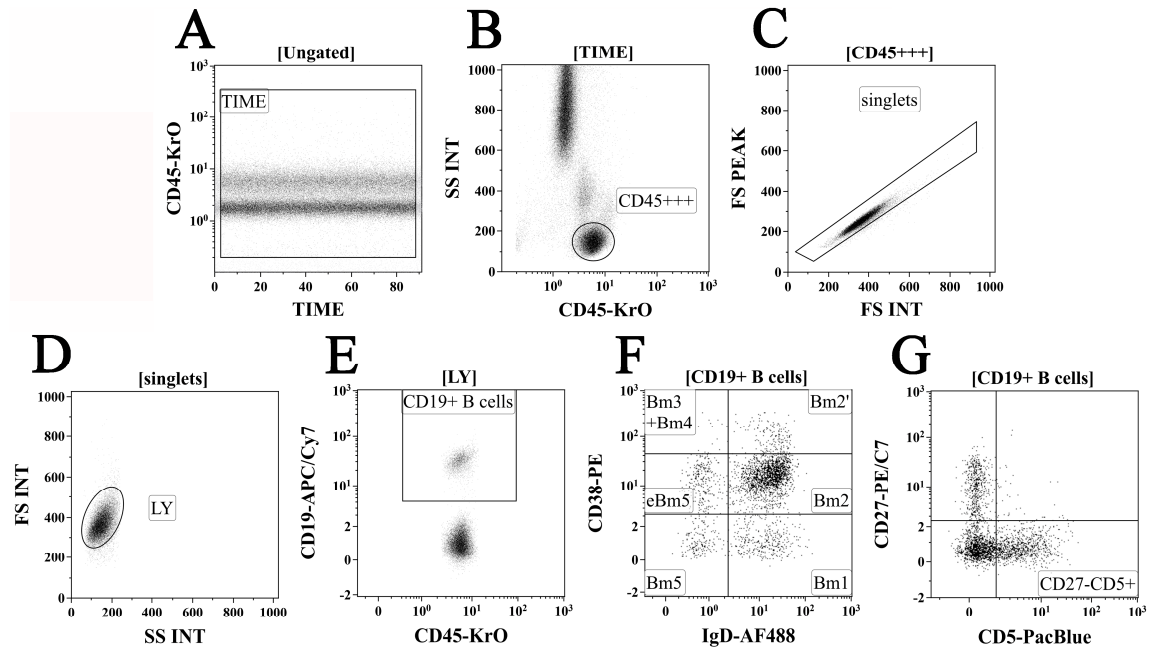

**Supplementary Figure S3.** Flow cytometry gating strategy used to define CD19+ B cell subsets.

Dot plot A – artifact exclusion by ‘time gating’; dot plot B – lymphocytes were determined as CD45+++SSlow cells; dot plot C – aggregated cells exclusion; dot plot D – cell debris exclusion; dot plot E – CD19+ B cells were identified based on CD19 expression. Dot plot F – so-called ‘Bm1-Bm5’ classification, that allowed us to determine main six B cell maturation subsets, including IgD+CD38– ‘virgin naïve’ Bm1 cells, IgD+CD38+ “activated naïve” Bm2 cells , pre- IgD+CD38++ pre-germinal-centre Bm2’ cells, IgD–CD38++ ‘Bm3 + Bm4’ subset, containing centroblasts and centrocytes, IgD–CD38+ early memory eBm5, and IgD–CD38– resting memory cells Bm5 cells. Dot plot G – CD5+CD27– B cell determination within total B cell subset.
